# Supplementary material for: Intraperitoneal Infusion of Mesenchymal Stem/Stromal Cells Prevents Experimental Autoimmune Uveitis in Mice
Source: Hindawi journal article supplement (doi:10.1155/2014/624640), 2014-01-01
Supplement: f1 [file 624640.f1.pdf]

1 **Supplemental figure legends**

2

3 **Supplemental figure 1. Flow cytometric analysis for  $\gamma\delta$  T cells in inguinal and popliteal LNs.**4 Time course demonstrated that the percentage of  $\gamma\delta$  TCR-expressing CD4<sup>+</sup> cells was increased on  
5 day 7 in popliteal and inguinal LNs of EAU mice, and decreased thereafter to baseline until day 21.6 Treatment with hMSCs did not affect the percentage of  $\gamma\delta$  T cells in either inguinal or popliteal LNs.7 Data are presented in mean  $\pm$  SEM. n=5 in each group.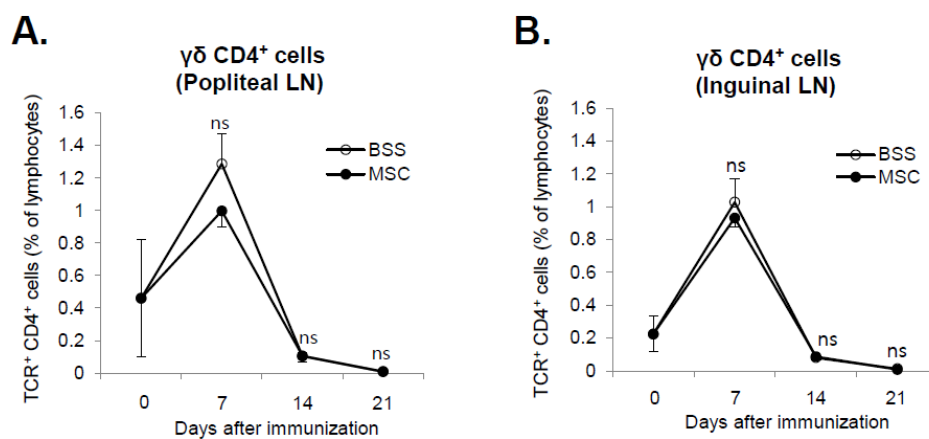

8

9

10

11

12

13

14

15

1 **Supplemental figure 2. Assay for CD4<sup>+</sup>CD25<sup>+</sup>Foxp3<sup>+</sup> regulatory T cells in inguinal and**  
2 **popliteal LNs and in the spleen.**

3 Flow cytometric analysis for CD4<sup>+</sup>CD25<sup>+</sup>Foxp3<sup>+</sup> cells showed that the percentage of  
4 CD4<sup>+</sup>CD25<sup>+</sup>Foxp3<sup>+</sup> cells was not increased in popliteal or inguinal LNs and in the spleen by hMSCs.  
5 However, in the spleen, the percentage of CD4<sup>+</sup>CD25<sup>+</sup>Foxp3<sup>+</sup> cells was significantly lower in  
6 hMSCs-treated group. Data are presented in mean  $\pm$  SEM. n=5 in each group.

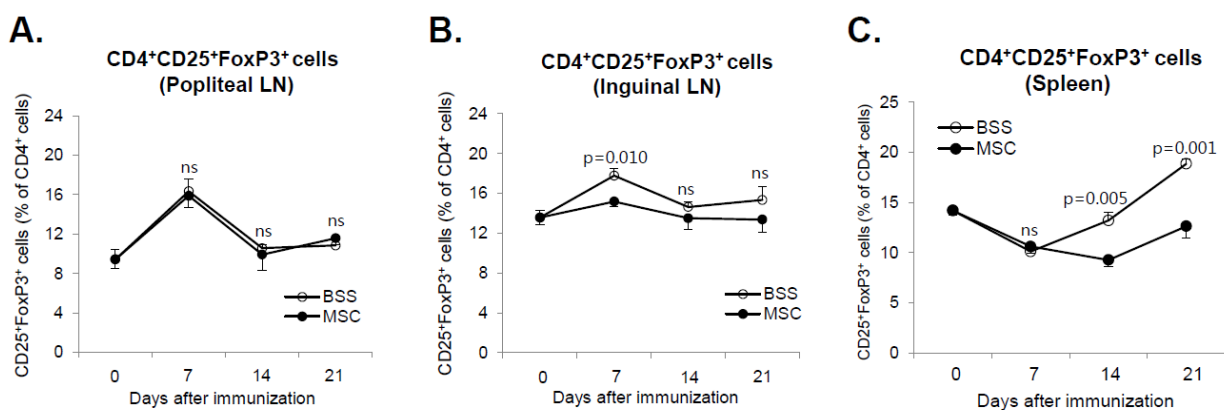

7

8
